# Supplementary material for: Distemper, extinction, and vaccination of the Amur tiger
Source: PubMed Central journal article supplement (PMC7749280; doi:10.1073/pnas.2000153117), 2020-11-23
Supplement: pnas.2000153117.sapp.pdf [file pnas.2000153117.sapp.pdf]

# PNAS

[www.pnas.org](http://www.pnas.org)

Supplementary Information for

Distemper, extinction and vaccination of the Amur tiger.

Martin Gilbert, Nadezhda Sulikhan, Olga Uphyrkina, Mikhail Goncharuk, Linda Kerley, Enrique Hernandez Castro, Richard Reeve, Tracie Seimon, Denise McAloose, Ivan V. Seryodkin, Sergey V. Naidenko, Christopher A. Davis, Gavin S. Wilkie, Sreenu B. Vattipally, Walt E. Adamson, Chris Hinds, Emma C. Thomson, Brian J. Willett, Margaret J. Hosie, Nicola Logan, Michael McDonald, Robert J. Ossiboff, Elena I. Shevtsova, Stepan Belyakin, Anna A. Yurlova, Steven A. Osofsky, Dale G. Miquelle, Louise Matthews, Sarah Cleaveland.

Martin Gilbert

Email: [m.gilbert@cornell.edu](mailto:m.gilbert@cornell.edu)

**This PDF file includes:**

Figures S1 to S2  
Tables S1 to S7  
SI References

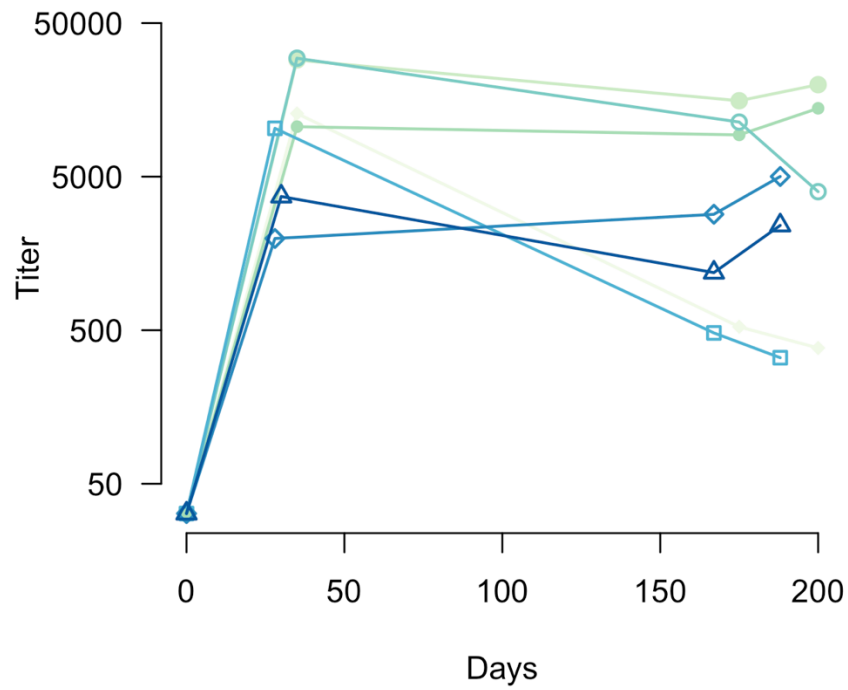

**Fig. S1.** Neutralizing antibody titers of seven tigers vaccinated with the modified live vaccine Nobivac DP (Merck, Kenilworth, NJ, USA) as assessed using vesicular stomatitis virus (VSV) pseudotypes bearing the H and F glycoproteins of the Russian viral strain (KX708722). Increasing titers of neutralizing antibodies following vaccine administration confirm that sera from vaccinated tigers were able to neutralize the wild strain circulating in tiger habitat.

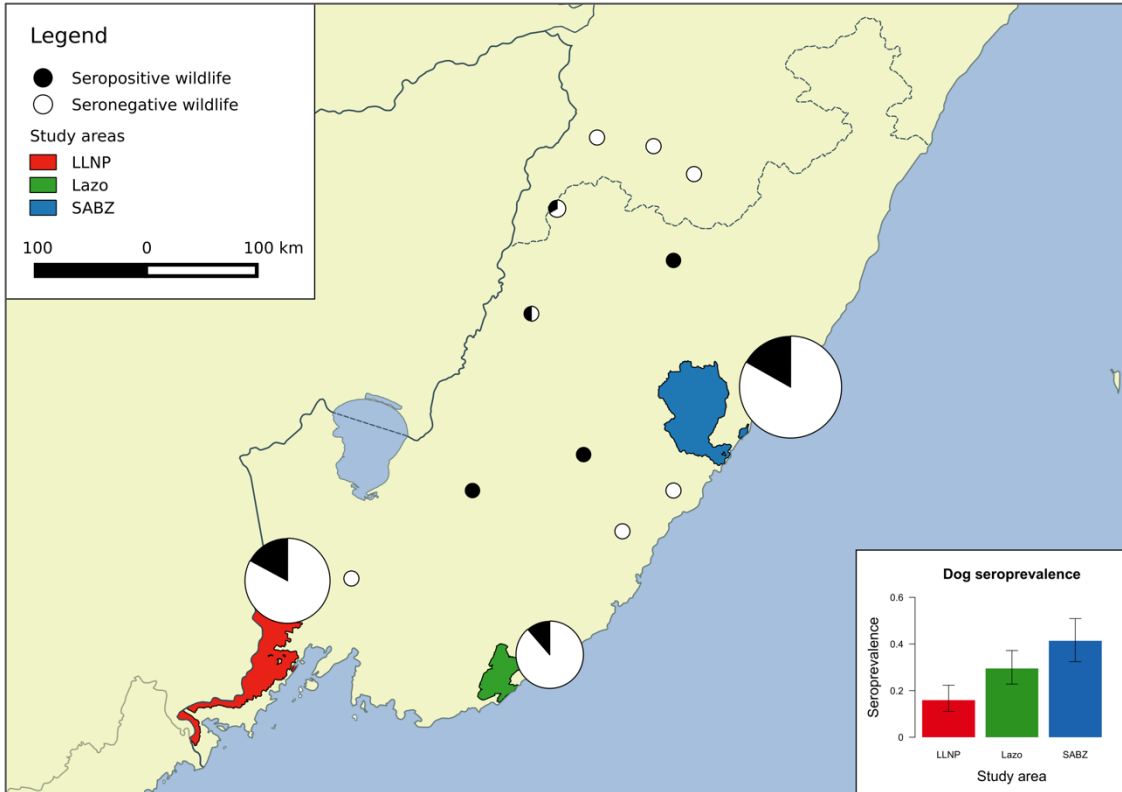

**Fig. S2.** Map demonstrating the exposure of domestic dogs and wild carnivores to canine distemper virus (CDV) across Primorsky Krai and neighbouring Khabarovsk Krai. Serology results from live-sampled wildlife are indicated as pie charts that are scaled based on sample size, indicating proportions of positive samples with canine distemper virus (CDV) neutralizing antibodies (black) and negative samples (white). These combine data from all sampled Amur tigers, Far Eastern leopards, Eurasian lynx, leopard cats, brown bears, Asiatic black bears, raccoon dogs, red foxes, Asian badgers, sable, Siberian weasels and American mink. Seroprevalence of unvaccinated domestic dogs sampled in the three study areas (Land of the Leopard National, LLNP – red; Lazovskii Zapovednik, Lazo – green; Sikhote-Alin Biosphere Zapovednik, SABZ – blue) are illustrated by the bar chart in the insert panel.

**Table S1.** Results of virus neutralization analyses against canine distemper virus (CDV) for serum samples collected from wild carnivores in the Russian Far East between 1992 and 2014. Neutralizing antibody titres of 1:16 or higher were considered positive. Animals aged three months or younger have been excluded. Seroprevalence is given as the number of positive samples expressed as a percentage of sample size, with lower and upper 95% binomial confidence intervals (CI). \* Samples tested at Washington State University against CDV Onderstepoort strain. † Samples tested at the University of Glasgow using Onderstepoort strain (Bussell derivative).

| <b>Species</b>        | <b>Positive</b> | <b>Sample size</b> | <b>Seroprev. (%)</b> | <b>Lower CI (%)</b> | <b>Upper CI (%)</b> |
|-----------------------|-----------------|--------------------|----------------------|---------------------|---------------------|
| Amur tiger *          | 20              | 66                 | 30.3                 | 19.9                | 43.0                |
| Far Eastern leopard * | 2               | 10                 | 20.0                 | 3.5                 | 55.8                |
| Eurasian lynx *       | 1               | 7                  | 14.3                 | 0.8                 | 58.0                |
| Leopard cat           | 2               | 16                 | 12.5                 | 2.2                 | 39.6                |
| Asiatic black bear *  | 1               | 25                 | 4.0                  | 0.2                 | 22.3                |
| Brown bear *          | 2               | 20                 | 10.0                 | 1.8                 | 33.1                |
| Raccoon dog †         | 12              | 35                 | 34.3                 | 19.7                | 52.3                |
| Red fox †             | 0               | 4                  | 0.0                  | 0.0                 | 60.4                |
| Sable †               | 0               | 2                  | 0.0                  | 0.0                 | 80.2                |
| Siberian weasel †     | 0               | 2                  | 0.0                  | 0.0                 | 80.2                |
| American mink †       | 0               | 2                  | 0.0                  | 0.0                 | 80.2                |
| Asian badger †        | 2               | 43                 | 4.7                  | 0.8                 | 17.1                |

**Table S2.** Published density estimates (animals/km<sup>2</sup>) for the four most abundant mesocarnivore species in Primorskii Krai. Low and high density estimates are based on non-urban settings within published sources, giving preference to Russian sources where available. Density estimates are not available for Asian badgers, so the range quoted refers to the closely related Eurasian badger (*Meles meles*), to which the taxon was formerly considered conspecific. Density estimates are extrapolated across the 155,000 km<sup>2</sup> distribution of the Amur tiger (4) to produce low and high population estimates.

| <b>Species name</b>                            | <b>Low density estimate</b> | <b>High density estimate</b> | <b>Low population estimate</b> | <b>High population estimate</b> | <b>References</b>              |
|------------------------------------------------|-----------------------------|------------------------------|--------------------------------|---------------------------------|--------------------------------|
| Sable<br><i>Martes zibellina</i>               | 0.04                        | 0.67                         | 6,200                          | 103,850                         | (Stroganov, 1969)              |
| Asian badger<br><i>Meles leucurus</i>          | 0.4                         | 1.5                          | 62,000                         | 232,500                         | (Larivière and Jennings, 2009) |
| Red fox<br><i>Vulpes vulpes</i>                | 0.49                        | 1.13                         | 75,950                         | 175,150                         | (Heydon et al., 2000)          |
| Raccoon dog<br><i>Nyctereutes procyonoides</i> | 0.34                        | 0.48                         | 52,700                         | 74,400                          | (Ward and Wurster-Hill, 1990)  |
| <b>Total</b>                                   |                             |                              | <b>196,850</b>                 | <b>585,900</b>                  |                                |

**Table S3.** Summary of samples tested for the presence of canine distemper virus (using either CDVF4/CDVR3 or Morb1/Morb2 primers), and of haemagglutinin (H) and fusion (F) genes sequenced.

| Survey                            | Species common name    | Species scientific name         | Sample type                                    | n     | CDV +ve | H    | F  |
|-----------------------------------|------------------------|---------------------------------|------------------------------------------------|-------|---------|------|----|
| <u>Household surveys</u>          |                        |                                 |                                                |       |         |      |    |
|                                   | Domestic dog           | <i>Canis familiaris</i>         | Nasal swab                                     | 633   | 0       | 0    | 0  |
|                                   |                        |                                 | Whole blood*                                   | 205   | 0       | 0    | 0  |
| <u>Clinic surveys</u>             |                        |                                 |                                                |       |         |      |    |
|                                   | Domestic dog           | <i>Canis familiaris</i>         | Conjunctival swab                              | 75    | 1       | <1** | 0  |
| <u>Dead wild carnivores</u>       |                        |                                 |                                                |       |         |      |    |
|                                   | Leopard cat            | <i>Prionailurus bengalensis</i> | Tissue                                         | 30    | 2       | 0    | 0  |
|                                   | Eurasian lynx          | <i>Lynx lynx</i>                | Tissue                                         | 4     | 0       | 0    | 0  |
|                                   | Leopard                | <i>Panthera pardus</i>          | Tissue                                         | 1     | 1       | 1    | 0  |
|                                   | Tiger                  | <i>Panthera tigris</i>          | Tissue                                         | 3     | 1       | 1    | 0  |
|                                   | Grey wolf              | <i>Canis lupus</i>              | Tissue                                         | 2     | 1       | 1    | 0  |
|                                   | Raccoon dog            | <i>Nyctereutes procyonoides</i> | Tissue                                         | 27    | 1       | 1    | 1  |
|                                   | Red fox                | <i>Vulpes vulpes</i>            | Tissue                                         | 9     | 0       | 0    | 0  |
|                                   | Asiatic black bear     | <i>Ursus thibetanus</i>         | Tissue                                         | 1     | 0       | 0    | 0  |
|                                   | Sable                  | <i>Martes zibellina</i>         | Tissue                                         | 518   | 25      | 17†  | 9  |
|                                   | Yellow-throated marten | <i>Martes flavigula</i>         | Tissue                                         | 3     | 1       | 0    | 0  |
|                                   | Siberian weasel        | <i>Mustela sibirica</i>         | Tissue                                         | 27    | 1       | 1    | 1  |
|                                   | American mink          | <i>Neovison vison</i>           | Tissue                                         | 4     | 0       | 0    | 0  |
|                                   | River otter            | <i>Lutra lutra</i>              | Tissue                                         | 3     | 0       | 0    | 0  |
|                                   | Asian badger           | <i>Meles leucurus</i>           | Tissue                                         | 5     | 2       | 1    | 1  |
|                                   | Unidentified           | Unidentified                    | Tissue                                         | 1     | 1       | 1    | 0  |
| <u>Wildlife surveys</u>           |                        |                                 |                                                |       |         |      |    |
|                                   | Sable                  | <i>Martes zibellina</i>         | Nasal swab                                     | 2     | 0       | 0    | 0  |
|                                   | Asian badger           | <i>Meles leucurus</i>           | Nasal swab                                     | 17    | 0       | 0    | 0  |
|                                   | Leopard cat            | <i>Prionailurus bengalensis</i> | Nasal swab                                     | 8     | 0       | 0    | 0  |
|                                   | Raccoon dog            | <i>Nyctereutes procyonoides</i> | Nasal swab                                     | 10    | 0       | 0    | 0  |
| <u>Archived blood</u>             |                        |                                 |                                                |       |         |      |    |
|                                   | Eurasian lynx          | <i>Lynx lynx</i>                | Serum                                          | 1     | 0       | 0    | 0  |
|                                   | Leopard                | <i>Panthera pardus</i>          | Whole blood /clots                             | 2     |         | 0    | 0  |
|                                   | Tiger                  | <i>Panthera tigris</i>          | Whole blood /clots                             | 20    | 1       | 1    | 0  |
|                                   | Raccoon dog            | <i>Nyctereutes procyonoides</i> | Serum                                          | 6     | 0       | 0    | 0  |
|                                   | Asiatic black bear     | <i>Ursus thibetanus</i>         | Serum                                          | 2     | 0       | 0    | 0  |
|                                   | Brown bear             | <i>Ursus arctos</i>             | Whole blood /clots                             | 1     | 0       | 0    | 0  |
|                                   | Asian badger           | <i>Meles leucurus</i>           | Serum                                          | 5     | 0       | 0    | 0  |
| <u>Next generation sequencing</u> |                        |                                 |                                                |       |         |      |    |
|                                   | Tiger                  | <i>Panthera tigris</i>          | Formalin fixed paraffin embedded tissue blocks | 4     | -       | 1§   | 1§ |
| <u>Scat survey</u>                |                        |                                 |                                                |       |         |      |    |
|                                   | Tiger                  | <i>Panthera tigris</i>          | Faeces                                         | 35    | 0       | 0    | 0  |
| <b>TOTAL</b>                      |                        |                                 |                                                | 1,664 |         | 26†  | 13 |

\* The 205 whole blood samples were analysed from a subset of the 633 dogs tested during passive surveillance, and so do not represent additional individuals.

\*\* Refers to a partial length sequence.

† Figure includes an H gene from which a gap of 442 base pairs could not be sequenced.

§ Full virus genome obtained from one animal.

**Table S4.** A summary of complete (COMP) and partial (PART) haemagglutinin gene (H) and fusion gene (F) sequences obtained from carnivores in the Russian Far East. Includes host species, location of origin (KH = Khabarovskii Krai, TY = Terneiskii district, PZ = Pozharskii district, LZ = Lazovskii district, LLNP = Land of the Leopard National Park, VL = Vladivostok), and GenBank accession number.

| <b>Species</b>               | <b>Study area</b> | <b>H gene</b> | <b>F gene</b> | <b>Accession number (H)</b> | <b>Accession number (F)</b> |
|------------------------------|-------------------|---------------|---------------|-----------------------------|-----------------------------|
| Unidentified small carnivore | TY                | COMP          | -             | KX708732                    | -                           |
| Amur tiger                   | KH                | COMP          | COMP          | KX774415                    | KX774415                    |
| Amur tiger                   | TY                | COMP          | -             | KX708720                    | -                           |
| Sable                        | TY                | COMP          | COMP          | KX708721                    | KX708734                    |
| Sable                        | TY                | COMP          | COMP          | KX708722                    | KX708735                    |
| Grey wolf                    | TY                | COMP          | -             | KX708711                    | -                           |
| Sable                        | TY                | COMP          | -             | KX708712                    | -                           |
| Sable                        | TY                | COMP          | COMP          | KX708713                    | KX708736                    |
| Sable                        | PZ                | COMP          | COMP          | KX708710                    | KX708737                    |
| Sable                        | TY                | COMP          | -             | KX708714                    | -                           |
| Sable                        | PZ                | COMP          | COMP          | KX708723                    | KX708738                    |
| Sable                        | PZ                | COMP          | COMP          | KX708724                    | KX708739                    |
| Sable                        | TY                | COMP          | COMP          | KX708715                    | KX708740                    |
| Sable                        | PZ                | COMP          | COMP          | KX708716                    | KX708741                    |
| Siberian weasel              | PZ                | COMP          | COMP          | KX708717                    | KX708742                    |
| Sable                        | PZ                | COMP          | COMP          | KX708725                    | KX708743                    |
| Asian badger                 | LLNP              | COMP          | COMP          | KX708718                    | KX708744                    |
| Amur tiger                   | LLNP              | COMP          | -             | KX708726                    | -                           |
| Raccoon dog                  | LLNP              | COMP          | COMP          | KX708727                    | KX708745                    |
| Sable                        | LZ                | PART          | -             | KX708733                    | -                           |
| Sable                        | LZ                | COMP          | -             | KX708719                    | -                           |
| Sable                        | LZ                | COMP          | -             | KX708728                    | -                           |
| Sable                        | LZ                | COMP          | -             | KX708729                    | -                           |
| Sable                        | LZ                | COMP          | -             | KX708730                    | -                           |
| Sable                        | TY                | COMP          | -             | KX708731                    | -                           |
| Far Eastern leopard          | LLNP              | COMP          | -             | MK169401                    | -                           |
| Domestic dog                 | VL                | PART          | -             | MK169402                    | -                           |

**Table S5.** Primer and probe sequences used in the detection of canine distemper virus. Restriction sequences used in cloning are indicated in red font. Sources refer to 1 = Scagliarini et al. (2007), 2 = Barrett et al., (1993), 3 = modified from Müller et al., (2011) with modifications indicated in blue font, Novel = primers designed for this study.

| Primer target                | Primer/probe name  | Primer sequence                       | Source |
|------------------------------|--------------------|---------------------------------------|--------|
| P-gene (partial)             | CDVF4              | GTCGGTAATCGAGGATTCGAGAG               | 1      |
|                              | CDVR3              | GCCGAAAGAATATCCCCAGTTAG               |        |
|                              | CDVProbe           | 6FAM-ATCTTCGCCAGAATCCTCAGTGCT-MGBNFQ  |        |
| P-gene (partial)             | MorbF              | ATGTTTATGATCACAGCGGT                  | 2      |
|                              | MorbR              | ATTGGGTTGCACCACTTGTC                  |        |
| HA-gene (partial)            | TSCDVH2-F          | TACTGAGTCCAATTTAGTGGTGTGCC            | Novel  |
|                              | TSCDVH3-R          | CATGAGAATCTTATACGGAC                  |        |
| HA-gene (complete)           | 1F                 | GGGCTCAGGTAGTCCARCAA                  | 3      |
|                              | 1R                 | CCTCCGGAGAGTGCTGATAA                  |        |
|                              | 2Farctic           | GTGAGACAATTGGGATCAGA                  | 3      |
|                              | 2Rarctic           | TGGGTGAGCGACAGGTGTC                   | 3      |
|                              | 3Farctic           | TGGGAATCTTTGGGGCAACA                  |        |
|                              | 3R                 | TCCATAATCTGGGATGTTTGAA                | 3      |
|                              | 4Farctic           | ATCCCTCATGTGTTATCATT                  | 3      |
|                              | 4R                 | GACCTCAGGGTATAGAATCTGG                |        |
| HA-gene (complete) (cloning) | RusCDV5primUTR     | GCTCTGGTAGGAGAGCAATG                  | Novel  |
|                              | RusCDV5primUTR     | GTCCAATTGAGATGTGTATCATCATACT          | Novel  |
|                              | AmurtigercdvHsalF  | GGATGTCGACACCATGCTCTCCTACCAAGATAAGGT  |        |
|                              | AmurtigercdvHnot1R | GGATGCGGCCGCTCAAGGTTTTGAACGGTTACATGAG |        |
| F-gene (complete) (cloning)  | CDV5primUTR        | ACAAGCCTCATGCACAAGGAAAT               | Novel  |
|                              | CDV3primUTR        | GTGACTAGAGTGATTCAGAGTG                | Novel  |
|                              | cdvFsal1Fwd        | GGATGTCGACATGCACAAGGAAATCC            |        |
|                              | cdvFnot1R          | GGATGCGGCCGCTCAGAGTGATCTTACATAG       | Novel  |



**Table S6.** Estimated infection parameters used in the population viability model to assess the effectiveness of vaccination strategies to reduce the likelihood of population extinction from CDV. Sources for the estimates used are indicated.

| <b>Parameter</b>                            | <b>Value</b> | <b>Justification</b>               |
|---------------------------------------------|--------------|------------------------------------|
| CDV mortality rate                          | 35%          | Greene and Apel 2006               |
| Dog prevalence                              | 0.0077       | See text                           |
| Dogs eaten per year                         | 0.965        | Median used in Gilbert et al. 2014 |
| Wild carnivore prevalence                   | 0.034        | Median used in Gilbert et al. 2014 |
| Wild carnivores eaten per year              | 2.76         | Median used in Gilbert et al. 2014 |
| Tiger contacts per month (male with female) | 2            | Goodrich et al. 2010               |
| Tiger contacts per month (female with male) | 1            | Goodrich et al. 2010               |

**Table S7.** Estimated budget for capturing and vaccinating tigers in Primorskii Krai. Budgets are based on 1) the cost of equipping a capture team that is able to vaccinate up to two tigers per year, and 2) the cost of supplying each capture team estimated on a per tiger basis. Costs are estimated in US dollars. \* Fuel costs are based on the expense of running a diesel Toyota Land Cruiser with estimated fuel consumption of 15 liters per 100 km and a diesel cost of \$0.70 per liter. Vehicles would be required to make two round trips of 100 km per week to keep capture teams supplied while in the field.

**1. Setup costs for equipping one trapping team (replace every 10 years)**

| Item                 | Unit  | Unit cost (USD) | Number of units | Subtotal      |
|----------------------|-------|-----------------|-----------------|---------------|
| Snares               | Each  | 40              | 40              | 1,600         |
| Supplies             | Total | 1               | 800             | 800           |
| Dart gun             | Each  | 2,000           | 1               | 2,000         |
| Anesthesia equipment | Total | 1,300           | 1               | 1,300         |
| Holding cage         | Each  | 1,000           | 1               | 1,000         |
| Satellite phone      | Each  | 600             | 1               | 600           |
| Two-way radio system | Each  | 300             | 1               | 300           |
| Vehicle              | Each  | 25,000          | 1               | 25,000        |
| <b>Total</b>         |       |                 |                 | <b>32,600</b> |

**2. Field costs per tiger (i.e. 43 days field time per tiger)**

| Item                                  | Unit      | Unit cost (USD) | Number of units | Subtotal      |
|---------------------------------------|-----------|-----------------|-----------------|---------------|
| Daily salary of Russian trapper #1    | Per day   | 45              | 43              | 1,955         |
| Daily salary of Russian trapper #2    | Per day   | 45              | 43              | 1,955         |
| Daily salary of international trapper | Per day   | 152             | 43              | 6,515         |
| Food (per person)                     | Per day   | 5               | 129             | 645           |
| Anesthetics                           | Per tiger | 65              | 1               | 65            |
| Emergency drugs                       | Per year  | 100             | 1               | 100           |
| Fuel*                                 | Per km    | 0               | 2,457           | 258           |
| Repairs                               | Per year  | 1,500           | 1               | 1,500         |
| Satellite phone airtime               | Per day   | 5               | 43              | 215           |
| <b>Total</b>                          |           |                 |                 | <b>13,207</b> |

## SI References

1. Scagliarini A, Dal Pozzo F, Gallina L, Vaccari F, Morganti L (2007) TaqMan based real time PCR for the quantification of canine distemper virus. *Vet. Res. Commun.* 31 Suppl 1:261–3.
2. Barrett T et al. (1993) Dolphin and porpoise morbilliviruses are genetically distinct from phocine distemper virus. *Virology* 193:1010–1012
3. Müller A, Silva E, Santos N, Thompson G (2011) Domestic dog origin of canine distemper virus in free-ranging wolves in Portugal as revealed by hemagglutinin gene characterization. *J. Wildl. Dis.* 47:725–729.
4. Hebblewhite M et al. (2014) Including biotic interactions with ungulate prey and humans improves habitat conservation modeling for endangered Amur tigers in the Russian Far East. *Biol Conserv* 178:50–64.
5. Stroganov SU (1969) in *Carniverous Mammals of Siberia [Translated from Russian]* (Israel Program for Scientific Translations).
6. Larivière S, Jennings AP (2009) in *Handbook of the Mammals of the World. 1. Carnivores*, eds Wilson DE, Mittermeier RA (Lynx Editions, Barcelona), pp 564–656.
7. Heydon MJ, Reynolds JC, Short MJ (2000) Variation in abundance of foxes (*Vulpes vulpes*) between three regions of rural Britain, in relation to landscape and other variables. *J Zool London* 251:253–264.
8. Ward OG, Wurster-Hill DH (1990) *Nyctereutes procyonoides*. *Mamm Species* 358:1–5.
9. Goodrich JM et al. (2010) Spatial structure of Amur (Siberian) tigers (*Panthera tigris altaica*) on Sikhote-Alin Biosphere Zapovednik, Russia. *J. Mammal.* 91:737–748.
10. Greene CE, Appel MJ (2006) in *Infectious diseases of the dog and cat*, ed Green CE (Elsevier, St Louis, Missouri), pp 25–41. Third Edit.
11. Gilbert M et al. (2014) Estimating the potential impact of canine distemper virus on the Amur tiger population (*Panthera tigris altaica*) in Russia. *PLoS One* 9:e110811.
